# Supplementary material
Source: publisher figshare collection journal article supplement (https://acs.figshare.com/ndownloader/files/5964960)
Supplement: Supplementary file 1 [file 5964960]

## Sheet: Sheet1
AID	AssaySource	AssayReference	Technology	AssayType	TargetName	Organism	Protein Class
434973	Burnham Center for Chemical Genomics	BCCG-A373-SENP7-Primary-Assay	uHTS Luminescence	Biochem	SUMO1/sentrin specific peptidase 7 [Homo sapiens]	Homo sapiens	Protease
485273	Burnham Center for Chemical Genomics	SBCCG-A429-UBC13-Primary-TR-FRET-Assay	TR-FRET	Biochem	ubiquitin-conjugating enzyme E2 N [Homo sapiens]	Homo sapiens	Enzyme
489030	Burnham Center for Chemical Genomics	SBCCG-A530-APFP-1-Inhibitor-Primary-Assay	uHTS Fluorescence	Biochem	Apoptotic peptidase activating factor 1 [Homo sapiens]	Homo sapiens	Unclassified protein
489031	Burnham Center for Chemical Genomics	SBCCG-A526-APFP-1-Activator-Primary-Assay	uHTS Fluorescence	Biochem	Apoptotic peptidase activating factor 1 [Homo sapiens]	Homo sapiens	Unclassified protein
493011	Burnham Center for Chemical Genomics	SBCCG-A539-APOBEC3A-Inhibitor-Primary-Assay	uHTS Fluorescence	Biochem	probable DNA dC->dU-editing enzyme APOBEC-3A [Homo sapiens]	Homo sapiens	Enzyme
493012	Burnham Center for Chemical Genomics	SBCCG-A540-APOBEC3G-Inhibitor-Primary-Assay	uHTS Fluorescence	Biochem	DNA dC->dU-editing enzyme APOBEC-3G [Homo sapiens]	Homo sapiens	Enzyme
493091	Burnham Center for Chemical Genomics	SBCCG-A551-SCP1-Inhibitor-Primary-Assay	uHTS Calorimetry	Biochem	carboxy-terminal domain RNA polymerase II polypeptide A small phosphatase 1 isoform 1 [Homo sapiens]	Homo sapiens	Enzyme
493160	Burnham Center for Chemical Genomics	SBCCG-A579-HKDC1-Inhibitor-Primary-Assay	uHTS Fluorescence	Biochem	putative hexokinase HKDC1 [Homo sapiens]	Homo sapiens	Enzyme
504462	Burnham Center for Chemical Genomics	SBCCG-A593-ATG4B-Primary-Assay	uHTS Fluorescence	Biochem	cysteine protease ATG4B isoform a [Homo sapiens]	Homo sapiens	Protease
504690	Burnham Center for Chemical Genomics	SBCCG-A639-pfG6PDH-Primary-Assay	uHTS Fluorescence	Biochem	glucose-6-phosphate dehydrogenase-6-phosphogluconolactonase [Plasmodium falciparum 3D7]	Plasmodium berghei	Enzyme
504720	Burnham Center for Chemical Genomics	SBCCG-A647-MazEF-Act-Primary-Assay	uHTS Fluorescence	Biochem	mRNA interferase toxin, antitoxin is MazE [Escherichia coli str. K-12 substr. MG1655]	Escherichia coli str. K-12 substr. MG1655	Enzyme
588458	Burnham Center for Chemical Genomics	SBCCG-A699-DNMT1-Inh-Primary-Assay	uHTS Fluorescence	Biochem	DNA (cytosine-5)-methyltransferase 1 isoform b [Homo sapiens]	Homo sapiens	DNA methyltransferase
588489	Burnham Center for Chemical Genomics	SBCCG-A704-MLLE-PAM2-Inh-Primary-Assay	uHTS Fluorescence	Biochem	polyadenylate-binding protein 1 [Homo sapiens]	Homo sapiens	Unclassified protein
588493	Burnham Center for Chemical Genomics	SBCCG-A706-Rpn11-Inh-Primary-Assay	uHTS Fluorescence	Biochem	PSMD14 protein [Homo sapiens]	Homo sapiens	Enzyme
588621	Burnham Center for Chemical Genomics	SBCCG-A754-STEP-Primary-Assay	uHTS Fluorescence	Biochem	tyrosine-protein phosphatase non-receptor type 5 isoform a [Homo sapiens]	Homo sapiens	Phosphatase
588850	Burnham Center for Chemical Genomics	SBCCG-A764-CF-PAF-Primary-Assay	Fluorescence	Cell-based	cystic fibrosis transmembrane conductance regulator [Homo sapiens]	Homo sapiens	ABC Transporters
493187	Burnham Center for Chemical Genomics	SBCCG-A580-HKDC1-Activator-Primary-Assay	Fluorescence	Cell-based	putative hexokinase HKDC1 [Homo sapiens]	Homo sapiens	Kinase
493036	Burnham Center for Chemical Genomics	SBCCG-A549-NTR1-Agonist-Primary-Assay	HCS	Cell-based	neurotensin receptor type 1 [Homo sapiens]	Homo sapiens	GPCR
493098	Burnham Center for Chemical Genomics	SBCCG-A556-CCR6-Antagonist-Primary-Assay	Luminescence	Cell-based	C-C chemokine receptor type 6 [Homo sapiens]	Homo sapiens	GPCR
588473	Burnham Center for Chemical Genomics	SBCCG-A701-CRF-Agonist-Primary-Assay	Fluorescence	Cell-based	corticotropin-releasing hormone receptor 2 [Homo sapiens];corticotropin releasing factor-binding protein [Homo sapiens]	Homo sapiens;Homo sapiens	GPCR
588475	Burnham Center for Chemical Genomics	SBCCG-A702-CRF-Antagonist-Primary-Assay	Fluorescence	Cell-based	corticotropin-releasing hormone receptor 2 [Homo sapiens];corticotropin releasing factor-binding protein [Homo sapiens]	Homo sapiens;Homo sapiens	GPCR
602244	Burnham Center for Chemical Genomics	SBCCG-A778-CXCR6-Primary-DR-Assay	Luminescence	Cell-based	C-X-C chemokine receptor type 6 [Homo sapiens]	Homo sapiens	GPCR
588405	Burnham Center for Chemical Genomics	SBCCG-A685-PEG3-Inh-Primary-Assay	Luminescence	Cell-based	protein phosphatase 1 regulatory subunit 15A [Rattus norvegicus]	Rattus norvegicus	Phenotypic pathway
602141	Burnham Center for Chemical Genomics	SBCCG-A769-CF-PAF-Cytotox-Assay	Fluorescence	Cell-based	NfkB activation	Homo sapiens	Phenotypic pathway
435003	Burnham Center for Chemical Genomics	BCCG-A377-NFkB-JukratPMA-Primary-Assay	Luminescence	Cell-based	NfkB activation	Homo sapiens	Phenotypic pathway
435022	Burnham Center for Chemical Genomics	BCCG-A382-NFkB-697B-Primary-Assay	Luminescence	Cell-based	NfkB activation	Homo sapiens	Phenotypic pathway
463104	Burnham Center for Chemical Genomics	BCCG-A405-UPR-XBP1-PrimaryAgonist-Assay	Luminescence	Cell-based	UPR	Homo sapiens	Phenotypic pathway
449763	Burnham Center for Chemical Genomics	BCCG-A399-UPR-CHOP-PrimaryAgonist-Assay	Luminescence	Cell-based	UPR-CHOP	Homo sapiens	Unclassified protein
463190	Burnham Center for Chemical Genomics	SBCCG-A413-tim10-1-Primary-Antagonist-Assay	Luminescence	Cell-based	TPA: Essential protein of the mitochondrial intermembrane space, forms a complex with Tim9p (TIM10 complex) that delivers hydrophobic proteins to the TIM22 complex for insertion into the inner membrane [Saccharomyces cerevisiae S288c]	Saccharomyces cerevisiae S288c	Unclassified protein
463195	Burnham Center for Chemical Genomics	SBCCG-A415-tim10-Primary-Antagonist-Assay	Luminescence	Cell-based	TPA: Essential protein of the mitochondrial intermembrane space, forms a complex with Tim9p (TIM10 complex) that delivers hydrophobic proteins to the TIM22 complex for insertion into the inner membrane [Saccharomyces cerevisiae S288c]	Saccharomyces cerevisiae S288c	Unclassified protein
463212	Burnham Center for Chemical Genomics	SBCCG-A419-tim23-1-Primary-Antagonist-Assay	Luminescence	Cell-based	TPA: Essential component of the Translocase of the Inner Mitochondrial membrane (TIM23 complex); involved in protein import into mitochondrial matrix and inner membrane; with Tim17p, contributes to architecture and function of the import channel [Saccharomyces cerevisiae S288c]	Saccharomyces cerevisiae S288c	Unclassified protein
485346	Burnham Center for Chemical Genomics	SBCCG-A439-Mdm2-MdmX-Primary-Assay	Luminescence	Cell-based	E3 ubiquitin-protein ligase Mdm2 isoform MDM2 [Homo sapiens];protein Mdm4 [Homo sapiens]	Homo sapiens;Homo sapiens	Unclassified protein
588413	Burnham Center for Chemical Genomics	SBCCG-A686-Gli-Sufu-Antagonist-Primary-Assay	Fluorescence	Cell-based	Gli1 [Mus musculus]	Mus musculus	Unclassified protein
504810	NCGC	TSH002	FRET	Cell-based	TSHR protein [Homo sapiens]	Homo sapiens	Glycohormone receptor
504812	NCGC	TSH001	FRET	Cell-based	TSHR protein [Homo sapiens]	Homo sapiens	Glycohormone receptor
485344	NCGC	DOP2301	Fluorescence	Cell-based	D(2) dopamine receptor isoform long [Homo sapiens]	Homo sapiens	GPCR
485347	NCGC	DOP2201	Fluorescence	Cell-based	D(2) dopamine receptor isoform long [Homo sapiens]	Homo sapiens	GPCR
485358	NCGC	DOP2101	Fluorescence	Cell-based	D(2) dopamine receptor isoform long [Homo sapiens]	Homo sapiens	GPCR
493056	NCGC	TRHR346	Fluorescence	Cell-based	thyrotropin-releasing hormone receptor [Homo sapiens]	Homo sapiens	GPCR
493084	NCGC	TRHR349	Fluorescence	Cell-based	thyrotropin-releasing hormone receptor [Homo sapiens]	Homo sapiens	GPCR
504651	NCGC	DOP1003	Fluorescence	Cell-based	D(1A) dopamine receptor [Homo sapiens]	Homo sapiens	GPCR
504660	NCGC	DOP1001	Fluorescence	Cell-based	D(1A) dopamine receptor [Homo sapiens]	Homo sapiens	GPCR
504652	NCGC	DOP1002	Fluorescence	Cell-based	D(1A) dopamine receptor [Homo sapiens]	Homo sapiens	GPCR
540275	NCGC	TRPVA001	Fluorescence	Cell-based	transient receptor potential cation channel subfamily V member 1 [Homo sapiens]	Homo sapiens	Ion channel
540277	NCGC	TRPVP001	Fluorescence	Cell-based	transient receptor potential cation channel subfamily V member 1 [Homo sapiens]	Homo sapiens	Ion channel
540267	NCGC	GIAR001	Luminescence	Cell-based	Giardia	Giardia	Phenotypic pathway
1053197	The Scripps Research Institute Molecular Screening Center	SIAE_INH_FP_1536_1X%INH PRUN	Fluorescence	Biochem	RecName: Full=Sialate O-acetylesterase; AltName: Full=H-Lse; AltName: Full=Sialic acid-specific 9-O-acetylesterase; Flags: Precursor [Homo sapiens]	Homo sapiens	Hydrolase
1899	The Scripps Research Institute Molecular Screening Center	HCVCORE_INH_HTRF_1536_1X%INH	TR-FRET	Biochem	core protein [Hepatitis C virus]	Hepatitis C virus	Unclassified protein
1906	The Scripps Research Institute Molecular Screening Center	CTSL1_INH_FLINT_1536_1X%INH	QFRET	Biochem	cathepsin L1 [Homo sapiens]	Homo sapiens	Protease
1947	The Scripps Research Institute Molecular Screening Center	FAM108B_INH_FP_1536_1X%INH	Fluorescence	Biochem	Fam108b protein [Mus musculus]	Mus musculus	Hydrolase
1950	The Scripps Research Institute Molecular Screening Center	EBNA1_INH_FP_1536_1X%INH	Fluorescence	Biochem	EBNA-1 protein [Human herpesvirus 4]	Human herpesvirus 4	Unclassified protein
1962	The Scripps Research Institute Molecular Screening Center	TPT1_INH_FP_1536_1X%INH	Fluorescence	Biochem	likely tRNA 2'-phosphotransferase [Candida albicans SC5314]	Candida albicans SC5314	Unclassified protein
1974	The Scripps Research Institute Molecular Screening Center	GSTO1-1_INH_FP_1536_1X%INH	Fluorescence	Biochem	glutathione-S-transferase omega 1 [Homo sapiens]	Homo sapiens	Enzyme
1987	The Scripps Research Institute Molecular Screening Center	PP5_INH_FLINT_1536_1X%INH	Fluorescence	Biochem	PPP5C protein [Homo sapiens]	Homo sapiens	Phosphatase
463082	The Scripps Research Institute Molecular Screening Center	PPAFAH_INH_FP_1536_1X%INH PRUN	Fluorescence	Biochem	platelet-activating factor acetylhydrolase precursor [Homo sapiens]	Homo sapiens	Enzyme
463141	The Scripps Research Institute Molecular Screening Center	PROCASPASE3_ACT_EPIABS_1536_1X%ACT PRUN	Absorbance	Biochem	caspase-3 preproprotein [Homo sapiens]	Homo sapiens	Protease
463210	The Scripps Research Institute Molecular Screening Center	PROCASPASE7_ACT_EPIABS_1536_1X%ACT CSRUN	Absorbance	Biochem	caspase 7, apoptosis-related cysteine peptidase [Homo sapiens]	Homo sapiens	Protease
485272	The Scripps Research Institute Molecular Screening Center	PAD4_INH_FP_1536_1X%INH PRUN	Fluorescence	Biochem	protein-arginine deiminase type-4 [Homo sapiens]	Homo sapiens	Enzyme
492953	The Scripps Research Institute Molecular Screening Center	PAFAH1B2_INH_FP_1536_1X%INH PRUN	Fluorescence	Biochem	platelet-activating factor acetylhydrolase IB subunit beta isoform b [Homo sapiens]	Homo sapiens	Enzyme
492956	The Scripps Research Institute Molecular Screening Center	PAFAH2_INH_FP_1536_1X%INH PRUN	Fluorescence	Biochem	platelet-activating factor acetylhydrolase 2, cytoplasmic [Homo sapiens]	Homo sapiens	Hydrolase
492972	The Scripps Research Institute Molecular Screening Center	PAFAH1B3_INH_FP_1536_1X%INH PRUN	Fluorescence	Biochem	platelet-activating factor acetylhydrolase IB subunit gamma [Homo sapiens]	Homo sapiens	Enzyme
493008	The Scripps Research Institute Molecular Screening Center	RTF_ACT_FLINT_1536_1X%ACT PRUN SENS	Fluorescence	Biochem	troponin C, slow skeletal and cardiac muscles [Homo sapiens];troponin I, cardiac muscle [Homo sapiens];troponin T, cardiac muscle isoform 3 [Homo sapiens];cardiac alpha tropomyosin [Sus scrofa]	Homo sapiens;Homo sapiens;Homo sapiens;Sus scrofa	Unclassified protein
493244	The Scripps Research Institute Molecular Screening Center	RTF_INH_FLINT_1536_1X%INH DESENS	Fluorescence	Biochem	troponin C, slow skeletal and cardiac muscles [Homo sapiens];troponin I, cardiac muscle [Homo sapiens];troponin T, cardiac muscle isoform 3 [Homo sapiens];cardiac alpha tropomyosin [Sus scrofa]	Homo sapiens;Homo sapiens;Homo sapiens;Sus scrofa	Unclassified protein
504411	The Scripps Research Institute Molecular Screening Center	DAGLB_INH_QFRET_1536_1X%INH PRUN	Fluorescence	Biochem	sn1-specific diacylglycerol lipase beta isoform 1 [Homo sapiens]	Homo sapiens	Enzyme
504700	The Scripps Research Institute Molecular Screening Center	PKAR2B_ACT_FP_1536_1X%ACT PRUN	Fluorescence	Biochem	cAMP-dependent protein kinase catalytic subunit beta isoform 3 [Homo sapiens];cAMP-dependent protein kinase type II-beta regulatory subunit [Homo sapiens]	Homo sapiens;Homo sapiens	Kinase
504707	The Scripps Research Institute Molecular Screening Center	PKAR1A_ACT_FP_1536_1X%ACT PRUN	Fluorescence	Biochem	cAMP-dependent protein kinase catalytic subunit beta isoform 1 [Mus musculus];cAMP-dependent protein kinase type I-alpha regulatory subunit [Bos taurus]	Mus musculus;Bos taurus	Kinase
504803	The Scripps Research Institute Molecular Screening Center	HTRA1_INH_FP_1536_1X%INH PRUN	Fluorescence	Biochem	HTRA1 protein	Homo sapiens	Protease
588335	The Scripps Research Institute Molecular Screening Center	GDH-TPI_INH_ABS_1536_1X%INH CSRUN	Absorbance	Biochem		M. tuberculosis	Enzyme
588664	The Scripps Research Institute Molecular Screening Center	RIN1-ABL_INH_TRFRET_1536_1X%INH PRUN	TR-FRET	Biochem	ras and Rab interactor 1 [Homo sapiens];tyrosine-protein kinase ABL1 isoform a [Homo sapiens]	Homo sapiens;Homo sapiens	Kinase
588726	The Scripps Research Institute Molecular Screening Center	ALD_INH_FLINT_1536_1X%INH PRUN	Fluorescence	Biochem	fructose-bisphosphate aldolase [Mycobacterium tuberculosis H37Rv]	Mycobacterium tuberculosis H37Rv	Enzyme
602123	The Scripps Research Institute Molecular Screening Center	ELON_INH_FP_1536_1X%INH PRUN	Fluorescence	Biochem	DNA-binding ATP-dependent protease La [Escherichia coli str. K-12 substr. MG1655]	Escherichia coli str. K-12 substr. MG1655	Protease
602163	The Scripps Research Institute Molecular Screening Center	MSRA_ACT_ABS_1536_1X%ACT	Absorbance	Biochem	MSRA protein [Bos taurus]	Bos taurus	Enzyme
434962	The Scripps Research Institute Molecular Screening Center	IDE_INH_FP_1536_1X%INH PRUN	Fluorescence	Cell-based	insulin-degrading enzyme isoform 1 precursor [Homo sapiens]	Homo sapiens	Enzyme
493087	The Scripps Research Institute Molecular Screening Center	IDE_ACT_FP_1536_1X%ACT PRUN	Fluorescence	Cell-based	insulin-degrading enzyme isoform 1 precursor [Homo sapiens]	Homo sapiens	Enzyme
434989	The Scripps Research Institute Molecular Screening Center	OX1R_ANT_FLUO8_1536_1X%INH PRUN	Fluorescence	Cell-based	orexin receptor type 1 [Homo sapiens]	Homo sapiens	GPCR
463079	The Scripps Research Institute Molecular Screening Center	CHOK1_ANT_FLUO8_1536_1X%INH CSRUN	Fluorescence	Cell-based		Cricetulus griseus	GPCR
485270	The Scripps Research Institute Molecular Screening Center	OX1R_ANT_FRET_1536_1X%INH PRUN IP-ONE	FRET	Cell-based	orexin receptor type 1 [Homo sapiens]	Homo sapiens	GPCR
504326	The Scripps Research Institute Molecular Screening Center	OPRM1-OPRD1_AG_LUMI_1536_1X%ACT PRUN	Luminescence	Cell-based	mu-type opioid receptor isoform MOR-1 [Homo sapiens];delta-type opioid receptor [Homo sapiens]	Homo sapiens;Homo sapiens	GPCR
504357	The Scripps Research Institute Molecular Screening Center	OPRM1-OPRD1_IAG_LUMI_1536_1X%INH PRUN	Luminescence	Cell-based	mu-type opioid receptor isoform MOR-1 [Homo sapiens];delta-type opioid receptor [Homo sapiens]	Homo sapiens;Homo sapiens	GPCR
504634	The Scripps Research Institute Molecular Screening Center	HTR5A_IAG_LUMI_1536_1X%INH	Luminescence	Cell-based	5-hydroxytryptamine receptor 5A [Homo sapiens]	Homo sapiens	GPCR
504692	The Scripps Research Institute Molecular Screening Center	HTR5A_AG_LUMI_1536_1X%ACT	Luminescence	Cell-based	5-hydroxytryptamine receptor 5A [Homo sapiens]	Homo sapiens	GPCR
540295	The Scripps Research Institute Molecular Screening Center	MC4R_ANT_TRFRET_1536_1X%INH PRUN	TR-FRET	Cell-based	melanocortin receptor 4 [Homo sapiens]	Homo sapiens	GPCR
540308	The Scripps Research Institute Molecular Screening Center	MC4R_AG_LUMI_1536_1X%ACT PRUN	Luminescence	Cell-based	melanocortin receptor 4 [Homo sapiens]	Homo sapiens	GPCR
588814	The Scripps Research Institute Molecular Screening Center	CHRM1_AG_FLUO8_1536_1X%ACT PRUN	Fluorescence	Cell-based	muscarinic acetylcholine receptor M1 [Homo sapiens]	Homo sapiens	GPCR
588819	The Scripps Research Institute Molecular Screening Center	CHRM1_PAM_FLUO8_1536_1X%ACT PRUN	Fluorescence	Cell-based	muscarinic acetylcholine receptor M1 [Homo sapiens]	Homo sapiens	GPCR
588852	The Scripps Research Institute Molecular Screening Center	CHRM1_ANT_FLUO8_1536_1X%INH PRUN	Fluorescence	Cell-based	muscarinic acetylcholine receptor M1 [Homo sapiens]	Homo sapiens	GPCR
602247	The Scripps Research Institute Molecular Screening Center	CHOK1_PAM_FLUO8_1536_1X%ACT CSRUN M1	Fluorescence	Cell-based		Cricetulus griseus	GPCR
504734	The Scripps Research Institute Molecular Screening Center	TLR9_INH_BLA_1536_1X%INH PRUN	Fluorescence	Cell-based	toll-like receptor 9 [Homo sapiens]	Homo sapiens	Membrane receptor
504766	The Scripps Research Institute Molecular Screening Center	DAX1_INH_LUMI_1536_1X%INH PRUN	Luminescence	Cell-based	nuclear receptor subfamily 0 group B member 1 [Homo sapiens]	Homo sapiens	Nuclear receptor
588352	The Scripps Research Institute Molecular Screening Center	SRC3_INH_LUMI_1536_1X%INH PRUN	Luminescence	Cell-based	nuclear receptor coactivator 3 isoform a [Homo sapiens]	Homo sapiens	Nuclear receptor
588354	The Scripps Research Institute Molecular Screening Center	SRC1_INH_LUMI_1536_1X%INH PRUN	Luminescence	Cell-based	nuclear receptor coactivator 1 isoform 1 [Homo sapiens]	Homo sapiens	Nuclear receptor
602229	The Scripps Research Institute Molecular Screening Center	NR2E3-CELL_AG_LUMI_1536_1X%INH	Luminescence	Cell-based	photoreceptor-specific nuclear receptor [Homo sapiens]	Homo sapiens	Nuclear receptor
435030	The Scripps Research Institute Molecular Screening Center	ADDAB_INH_ABS_1536_1X%INH PRUN +phage	Absorbance	Cell-based	putative recombination protein RecB [Helicobacter pylori 26695];hypothetical protein HP1089 [Helicobacter pylori 26695]	Helicobacter pylori 26695;Helicobacter pylori 26695	Phenotypic pathway
449728	The Scripps Research Institute Molecular Screening Center	ECOLIV3065VBLTY_INH_ABS_1536_1X%INH PRUN CSRUN	Absorbance	Cell-based		Escherichia coli V3065	Phenotypic pathway
540364	The Scripps Research Institute Molecular Screening Center	FXN-GAA850_ACT_LUMI_1536_1X%ACT PRUN	Luminescence	Cell-based	FXN	Homo sapiens	Unclassified protein
